# Supplementary material for: The competitive role of C–H⋯X (X = F, O) and π–π interactions in contributing to the degree of charge transfer in organic cocrystals: a case study of heteroatom-free donors with p-fluoranil (FA)
Source: Royal Society of Chemistry journal article supplement (doi:10.1039/d2ce00925k), 2022-01-01
Supplement: d2ce00925k1.pdf [file d2ce00925k1.pdf]

## Supplementary information

# The Competitive Role of C-H $\cdots$ X (X=F, O) and $\pi$ - $\pi$ Interaction in Contributing to the Charge Transfer Degree in Organic Cocrystals: A Case Study of Heteroatoms-free Donors with *p*-Fluoranil (FA)

Jiaoyang Gao,<sup>a</sup> Jinjia Guo,<sup>a</sup> Yi Chen,<sup>b</sup> Shunlan Deng,<sup>b</sup> Qidong Lu,<sup>a</sup> Yuxin Ren,<sup>a</sup>

Xiaoming Wang,<sup>d</sup> Feng Teng,<sup>a</sup> Haibo Fan,<sup>a</sup> Xuexia He,<sup>\*,b</sup> Hui Jiang,<sup>\*,c</sup> and Peng

Hu<sup>\*,a</sup>

<sup>a</sup> *School of Physics, Northwest University, Xi'an 710069, P.R. China*

<sup>b</sup> *School of Materials Science and Engineering, Shaanxi Normal University, Xi'an 710119, P. R. China*

<sup>d</sup> *School of Chemistry & Chemical Engineering, Shaanxi Normal University, Xi'an 710062, China*

<sup>c</sup> *School of Materials Science and Engineering, Tianjin University, Tianjin 300072, P. R. China*

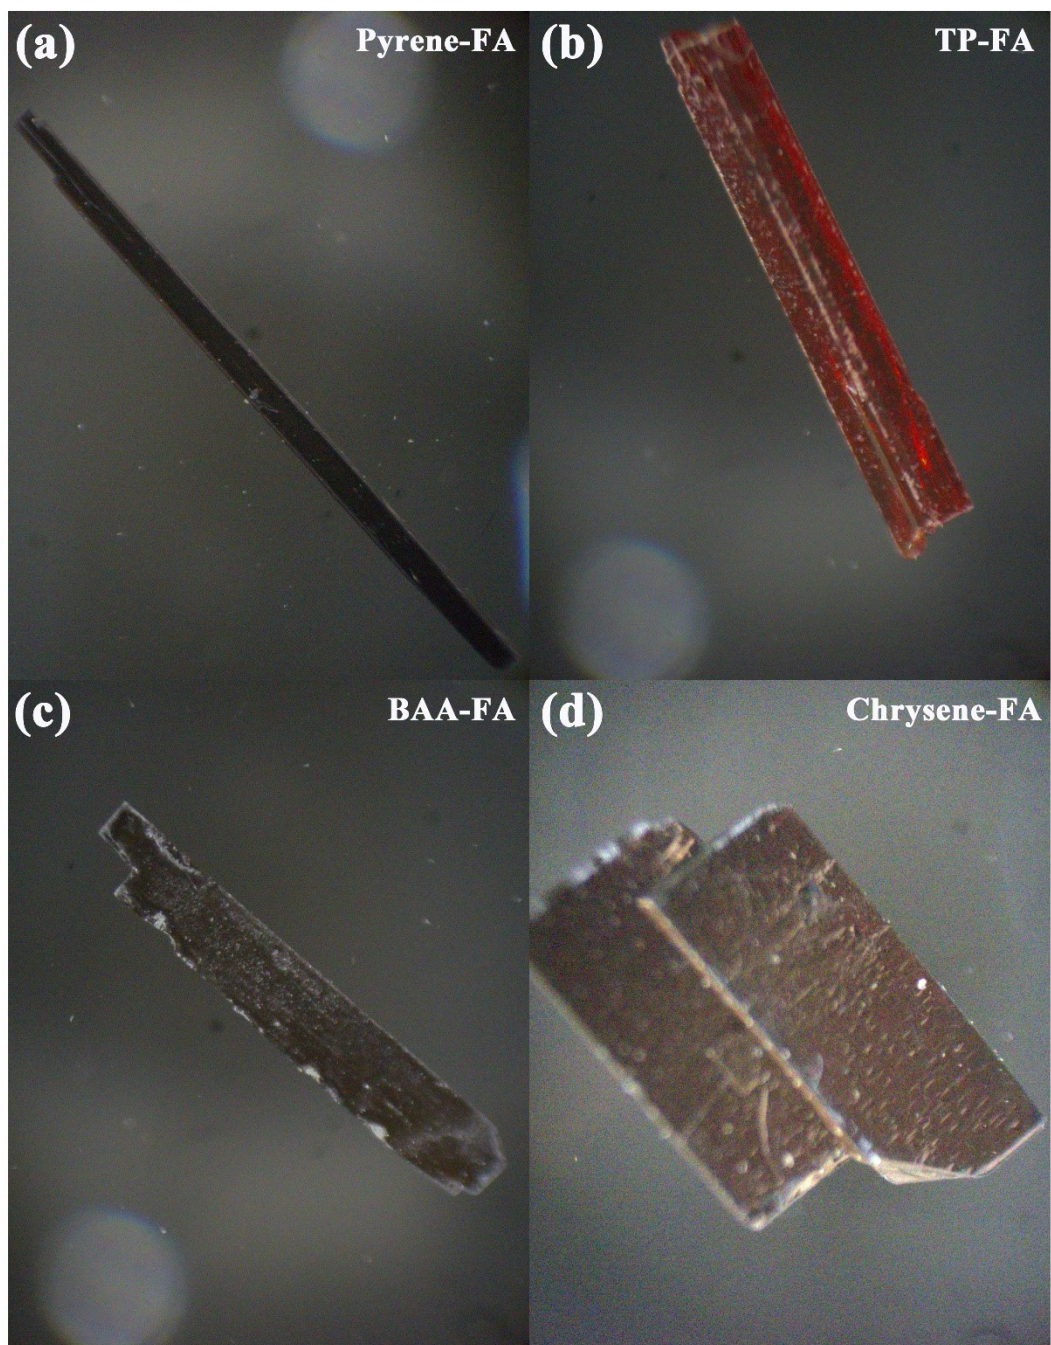

Figure S1. The optical images of the four charge transfer cocrystals in transmission mode.

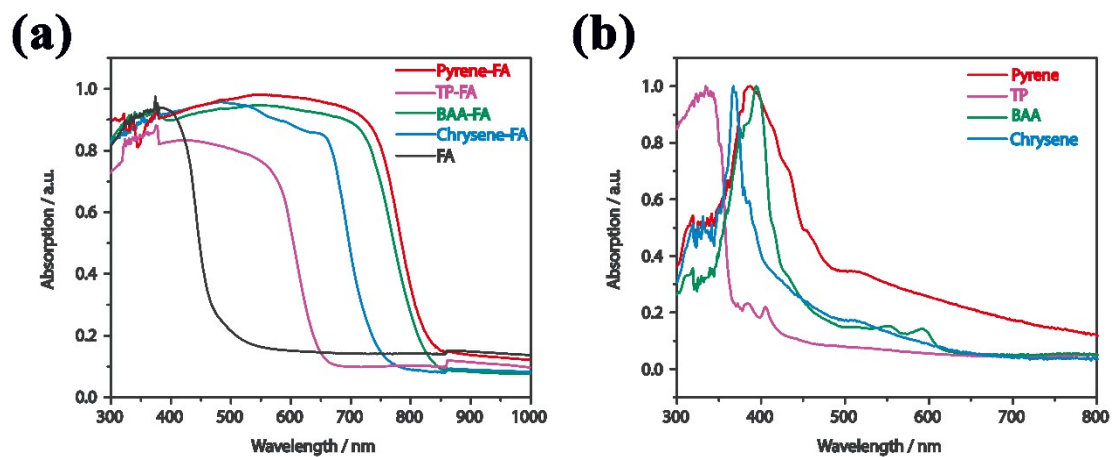

Figure S2. Solid state UV-vis-NIR diffuse reflectance spectra of (a) FA, pyrene-FA, TP-FA, BAA-FA and chrysene-FA (b) pyrene, TP, BAA and chrysene.

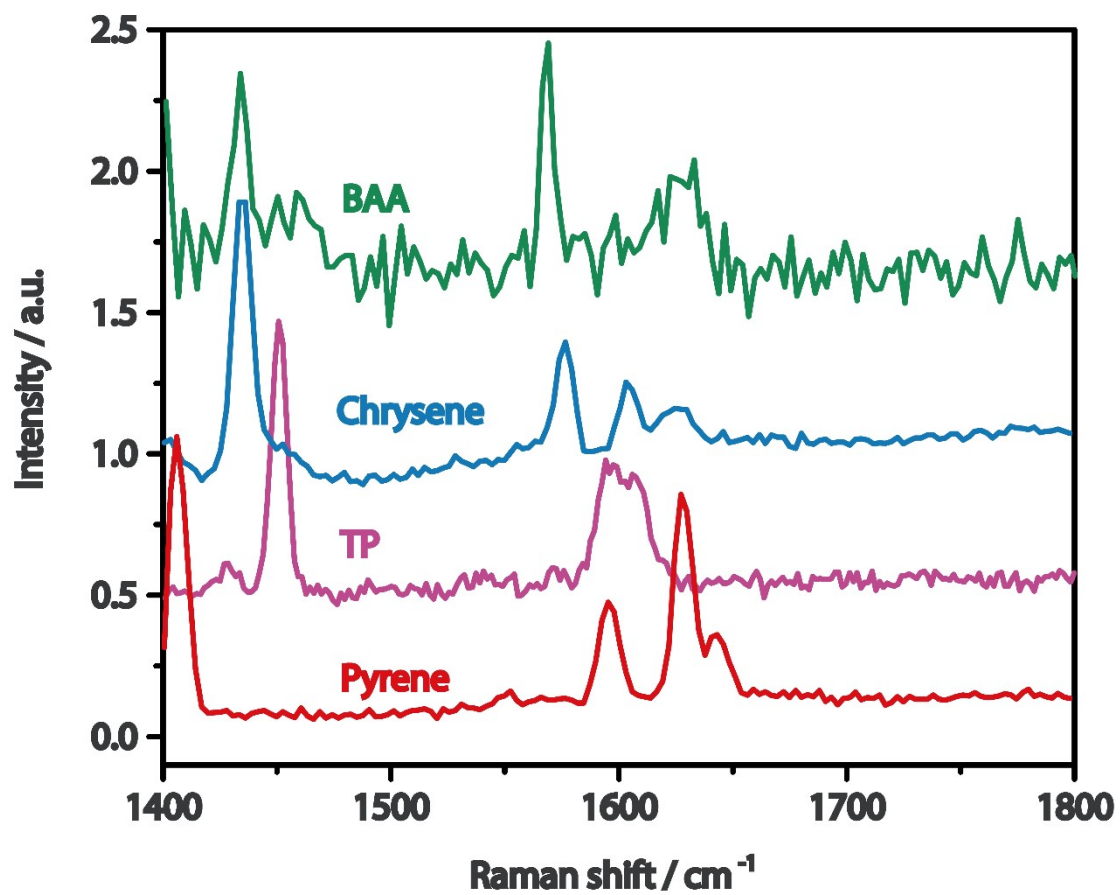

Figure S3. Raman spectra pristine pyrene, TP, BAA and chrysene.

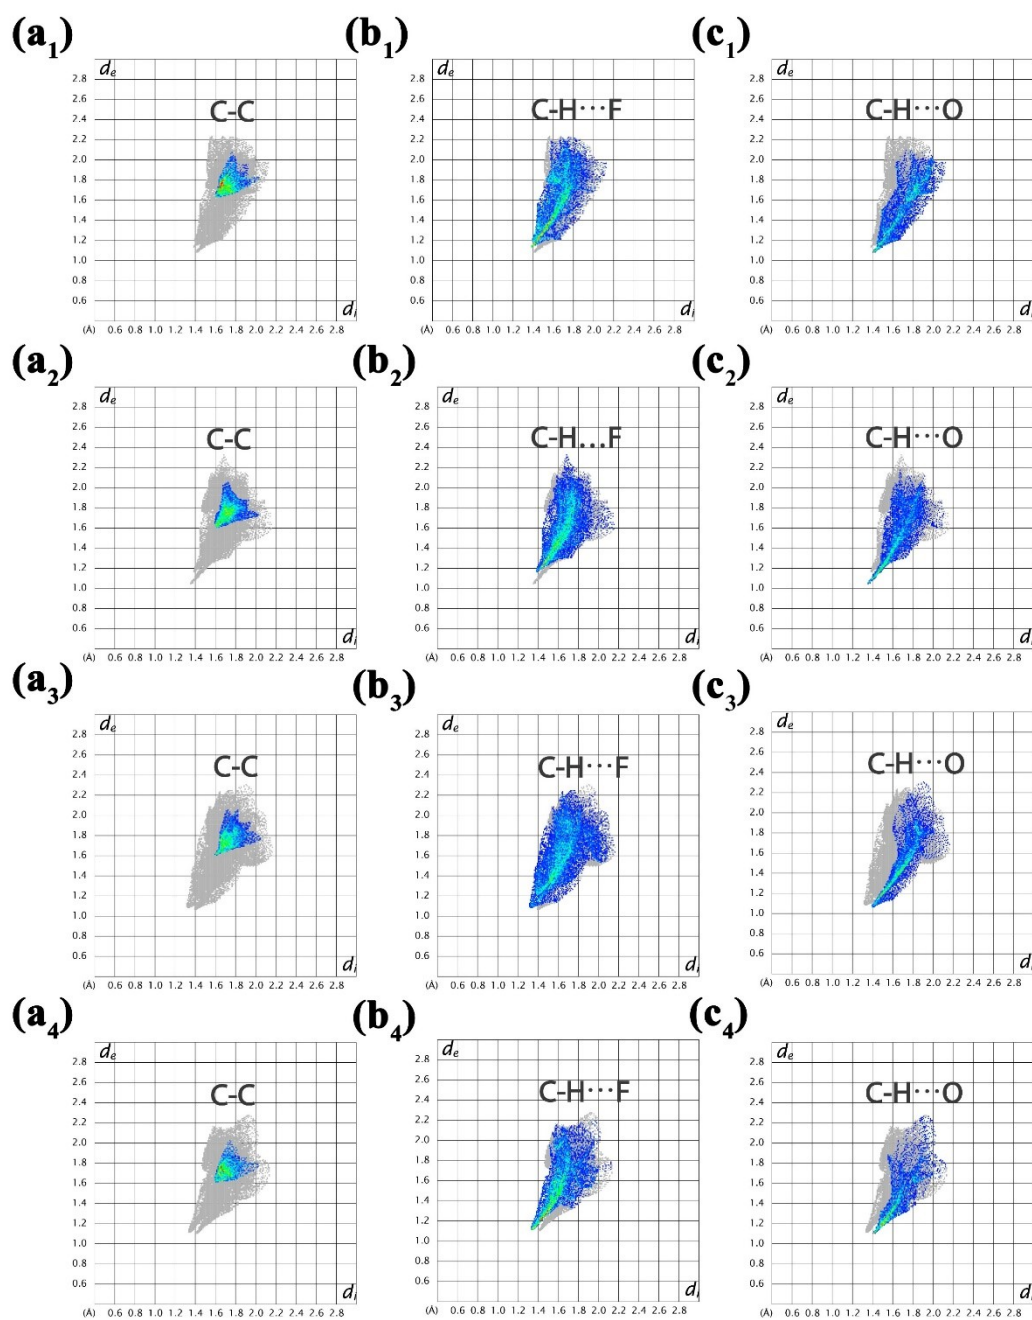

Figure S4. Fingerprint plots visualizing  $d_e$  and  $d_i$  for C-C contact, C-H...F contact and C-H...O contact for generated for FA in (a<sub>1</sub>, b<sub>1</sub>, c<sub>1</sub>) pyrene-FA cocrystal, (a<sub>2</sub>, b<sub>2</sub>, c<sub>2</sub>) TP-FA cocrystal, (a<sub>3</sub>, b<sub>3</sub>, c<sub>3</sub>) BAA-FA cocrystal, (a<sub>4</sub>, b<sub>4</sub>, c<sub>4</sub>) chrysene-FA cocrystal.



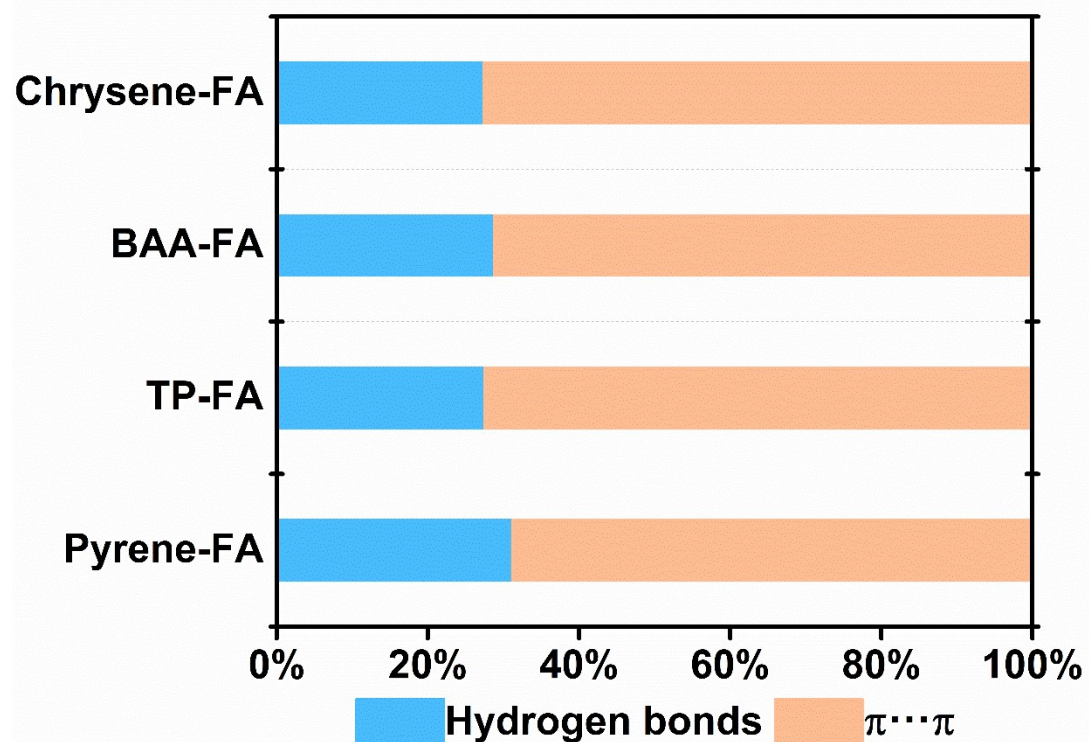

Figure S5. Percentage contributions to the Hirshfeld surface for the various intermolecular contacts for pyrene-FA, TP-FA, BAA-FA and chrysene-FA.
